# Supplementary material for: Improved isoprene detection performance of Si-doped WO3 films deposited by sputtering and post-annealing
Source: Royal Society of Chemistry journal article supplement (doi:10.1039/d4ra00184b), 2024-01-01

### Supplementary information

Because the resistance of  $\text{WO}_3$  films was too high to carry out Hall-effect measurements for identifying the type of charge carriers, Mott-Schottky curves were instead measured with the  $\text{WO}_3$  films deposited on the glass substrates, whose surface was coated with a layer of ITO as the bottom electrode.

The measured Mott-Schottky curves i.e.,  $C^{-2}$  vs.  $V$  (where  $C$  is the capacitance of space charge layer and  $V$  is the applied voltage), are shown in the figures below. Both films (0SiW and 6SiW) have the positive slope, indicating that they belong to the n-type semiconductors [R1].

Note: the measurements were performed by a commercial electrochemical workstation (CH Instruments, CHI6273E) with a standard three-electrode system. Pt wire and Ag/AgCl were used as the counter and reference electrodes, respectively. An aqueous solution of  $\text{Na}_2\text{SO}_4$  (0.5M, pH=7) was used as electrolyte.

[R1] Z. Chen, et al., Flat-Band Potential Techniques, in: Z. Chen, H.N. Dinh, E. Miller (Eds.), Photoelectrochemical Water Splitting: Standards, Experimental Methods, and Protocols, Springer, New York (2013), pp. 63-85.

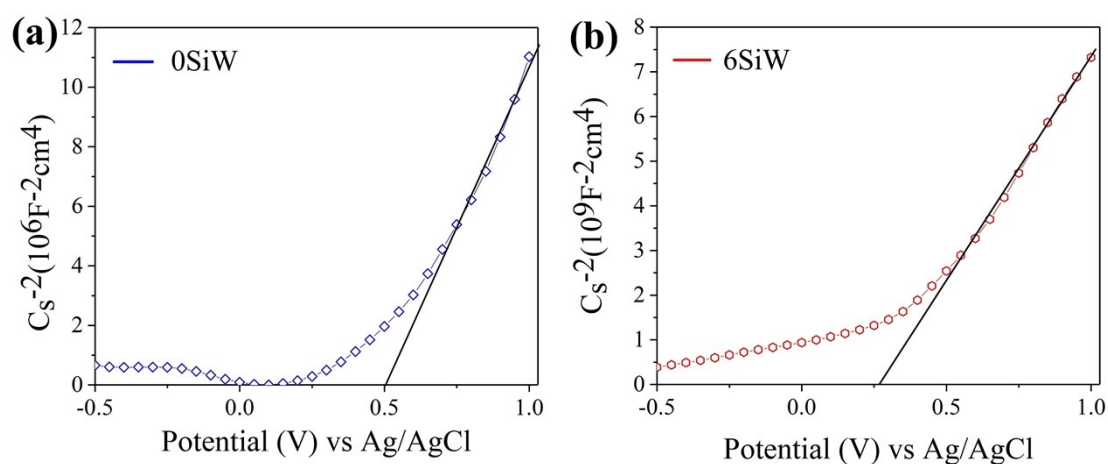

Supplement: d4ra00184b1.pdf [file d4ra00184b1.pdf]
